# Supplementary material for: Depletion of SMC5/6 sensitizes male germ cells to DNA damage
Source: PubMed Central journal article supplement — Mol Biol Cell. 2018 Dec 1;29(25):3003–16. doi: 10.1091/mbc.E18-07-0459 (PMC6333175; doi:10.1091/mbc.e18-07-0459), 2018-12-01
Supplement: mbc-29-3003-s001.pdf [file mbc-29-3003-s001.pdf]

# Supplemental Materials

*Molecular Biology of the Cell*

Hwang et al.

## Supplemental Figure Legends

### **Supplemental Figure S1: Conditional mutation of *Smc5* via germ cell-specific *Ddx4*-Cre recombinase causes decreased protein levels of SMC5/6 complex components and partial germ cell loss.**

(A) Table demonstrating that the proportion of *Smc5* flox/del, *Ddx4*-Cre cKO mice obtained (4.48%) is more than 5x less than expected (25%) from the breeding strategy used. (B) Protein extracts from crude germ cell isolates from control and *Smc5* flox/del, *Ddx4*-Cre cKO mice were loaded on a 4-15% SDS PAGE gradient gel and assessed for SMC5, SMC6, and NSMCE2 protein levels.  $\alpha$ -Tubulin was used as the loading control. Extracts were all from mice  $\geq$  12 weeks old. Protein levels of SMC5/6 components are reduced in all *Smc5* cKO extracts compared to controls. (C) Assessment of adult testis to body weight ratio (mg/mg), whereby *Smc5* flox/del, *Ddx4*-Cre cKO (n=5, mean=0.27) ratios are decreased compared to control (n=7, mean= 0.36). Bars indicate mean and standard error. The *P* value (Mann-Whitney, two-tailed) for the indicated comparison is significant,  $P < 0.0001$  (\*\*\*). (D) Periodic acid-Schiff staining of tubule cross sections from control and *Smc5* flox/del, *Ddx4*-Cre cKO testes. Markers: (Ser) Sertoli cell, (pL) pre-leptotene stage, (P) pachytene stage, (R) round spermatid, (E) elongated spermatid. Roman numerals correspond to the seminiferous tubule stage. The  $\Delta$  symbol indicates absence of marked cell type. Scale bar: 50  $\mu$ m.

### **Supplemental Figure S2: Conditional mutation of *Smc5* via germ cell-specific Cre recombinases causes decreased protein levels of SMC5/6 complex components**

(A) Bar graph of relative protein levels for each tested SMC5/6 complex component from crude germ cell isolates from control, *Smc5* cKO (*Stra8*-Cre), *Smc5* cKO (*Spo11*-Cre), and *Smc5* cKO (*Hspa2*-Cre) loaded on 4-15% SDS PAGE gradient gels shown in Figure 1C. Protein band signal intensities were normalized against  $\alpha$ -Tubulin loading control. Protein levels of SMC5/6 components are reduced in all *Smc5* cKO extracts compared to controls. (B) Bar graph of relative protein levels for each tested SMC5/6 complex component from STA-PUT purified germ cell isolates from control and *Smc5* cKO (*Stra8*-Cre) loaded on 4-15% SDS PAGE gradient gels shown in Figure 1E. Spermatocytes were purified via STA-PUT into specified prophase substages: leptotene/zygotene (L/Z,  $\sim$ 85% enrichment), pachytene (P,  $\sim$ 90% enrichment), and round spermatid (RS,  $\sim$ 95% enrichment). Spermatocytes were isolated from *Smc5* flox/del (control) and *Smc5* flox/del, *Stra8*-cre<sup>tg/0</sup> (*Smc5* cKO). Protein levels of SMC5 SMC6 and NSMCE2 are reduced in all *Smc5* cKO extracts compared to controls.

**Supplemental Figure S3: *Smc5 flox/del*, *Spo11-Cre* or *Smc5 flox/del*, *Hspa2-Cre* cKO mice did not show a difference in testis weight compared to controls**

(A) Testis of adult control (*Smc5 +/flox*, *Spo11-cre*<sup>tg/0</sup>) and *Smc5* cKO (*Smc5 flox/del*, *Spo11-cre*<sup>tg/0</sup>) mice. (B) Assessment of testis to body rate ratio (mg/mg) of adult control (n=4, mean= 0.39) and *Smc5* cKO (*Spo11-Cre*) (n=4, mean= 0.40) mice. Bars indicate average and standard error. The *P* value (Mann-Whitney, two-tailed) for the indicated comparison is not significant (n.s.). (C) Examples of tubule cross sections of testes from adult control and *Smc5* cKO (*Spo11-Cre*) mice stained with hematoxylin and eosin. *Smc5* cKO (*Spo11-Cre*) tubules are indistinguishable from controls. Scale bar: 500  $\mu$ m. (D) Testis of adult control (*Smc5 +/flox*, *Hspa2-cre*<sup>tg/0</sup>) and *Smc5* cKO (*Smc5 flox/del*, *Hspa2-cre*<sup>tg/0</sup>) mice. (E) Assessment of testis to body rate ratio (mg/mg) of adult control (n= 8, average= 0.35) and *Smc5* cKO (*Hspa2-Cre*) (n=6, average= 0.33) mice. Bars indicate average and standard error. The *P* value (Mann-Whitney, two-tailed) for the indicated comparison is not significant (n.s.). (F) Examples of tubule cross sections of testes from adult control and *Smc5* cKO (*Hspa2-Cre*) mice stained with hematoxylin and eosin. *Smc5* cKO (*Hspa2-Cre*) tubules are indistinguishable from controls. Scale bar: 500  $\mu$ m.

**Supplemental Figure S4: *Smc5 flox/del*, *Stra8-Cre*<sup>tg/0</sup> mutants do not have aberrant localization of proteins related to sex body formation and transcriptional silencing.**

Pachytene stage chromatin spread preparations from control and *Smc5* cKO (*Stra8-Cre*) mice immunolabeled with antibodies against CEN (blue, kinetochore/centromere marker), the SC lateral element protein SYCP3 (red) and proteins required for sex body formation (green in merge and white in lower panels) including (A) ATR, (B) TOPBP1, (C) HORMAD1, (D) SUMO1, (E) RNA polymerase II (RNA POLII). In (E), the sex body is circled to show lack of RNA polymerase II signal. All proteins assessed did not show an abnormal localization pattern in *Smc5* cKO chromatin spreads compared to the control. Scale bar: 10  $\mu$ m.

**Supplemental Figure S5: Whole body  $\gamma$ -irradiation causes DNA damage in control and *Smc5* cKO (*Stra8-Cre*) testes**

(A,B) Tubule cross sections in testes from control and *Smc5* cKO (*Stra8-Cre*) adult mice that were not irradiated (A) and from testes 6 days post whole body  $\gamma$ -irradiation (B). Cross sections immunolabeled with antibodies against the SC lateral element protein, SYCP3 (red),  $\gamma$ H2AX (green), and counterstaining of chromatin with DAPI (blue, DNA). Magnified images of single tubule in the bottom row.  $\gamma$ H2AX, a

marker for DNA damage, signal is not exclusive to the sex body in pachytene stage spermatocytes after whole body  $\gamma$ -irradiation in both the control and *Smc5*cKO (*Stra8-Cre*) testes, indicating  $\gamma$ -irradiation caused exogenous DNA damage to tubules. Scale bar: 50  $\mu$ m.

**Supplemental Figure S6: Conditional mutations of *Smc5* viagerm cell specific-Cre recombinases causes increased sensitivity to  $\gamma$ -irradiation resulting in increased spermatids abnormal morphology in tubules compared to control mice**

Bar graph assessing the percentage of spermatids with enlarged and normal morphology in control (n=2,291), *Smc5*cKO (*Stra8-Cre*, n=513), *Smc5* cKO (*Spo11-Cre*, n=2,408), and *Smc5* cKO (*Hspa2-Cre*, n=1,252) testes 10 days post-irradiation. While all *Smc5*cKO mutants have increased percentages of enlarged spermatids to the controls, *Smc5*cKO (*Stra8-Cre*) mice have the highest percentage, which is likely due to *Stra8-Cre* recombinase being expressed earlier than *Spo11-Cre* and *Hspa2-Cre*. Bars indicate standard error. The *P* values (Mann Whitney two-tailed t test) for the indicated comparisons are significant,  $P < 0.0001$  (\*\*\*) and  $P < 0.05$  (\*).

**Supplemental Table S1: Analysis of fertility, litter size and Cre excision efficiency**

At least three of each *Smc5*cKO mutant were assessed for fertility and compared to littermate controls. All mice were bred with female C57BL6/J mice. The genotypes of all pups were recorded to determine Cre excision efficiency of the *Smc5**flox* allele to produce progeny with the *Smc5 del* allele. The same colored columns represent the results from each *Smc5*cKO and littermate controls.

**Supplemental Table S2: Primary Antibodies used in this study**

Target protein for each primary antibody, host of antibody production, source of antibody, catalogue number and dilution factors are listed.

**A**

**Cross:** *Smc5+<sup>-/-</sup>, Ddx4-Cre tg/0* x *Smc5<sup>lox/lox</sup>*

| Genotypes      | <i>Smc5+<sup>/flox</sup></i> | <i>Smc5<sup>del/flox</sup></i> | <i>Smc5+<sup>/flox</sup>, Ddx4-Cre tg/0</i> | <i>Smc5<sup>del/flox</sup>, Ddx4-Cre tg/0</i> | TOTAL |
|----------------|------------------------------|--------------------------------|---------------------------------------------|-----------------------------------------------|-------|
| Expected %     | 25%                          | 25%                            | 25%                                         | 25%                                           | 100%  |
| Number of pups | 109                          | 112                            | 133                                         | 18                                            | 372   |
| Actual %       | 29.30%                       | 30.11%                         | 35.75%                                      | 4.84%                                         | 100%  |

**B**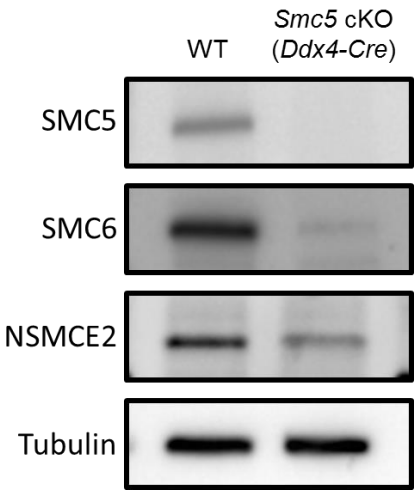**C**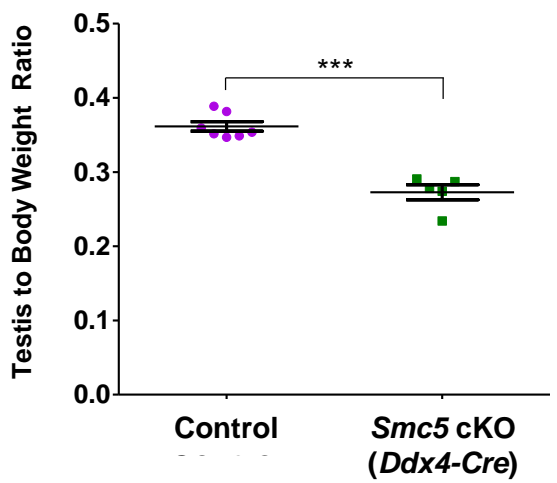**D**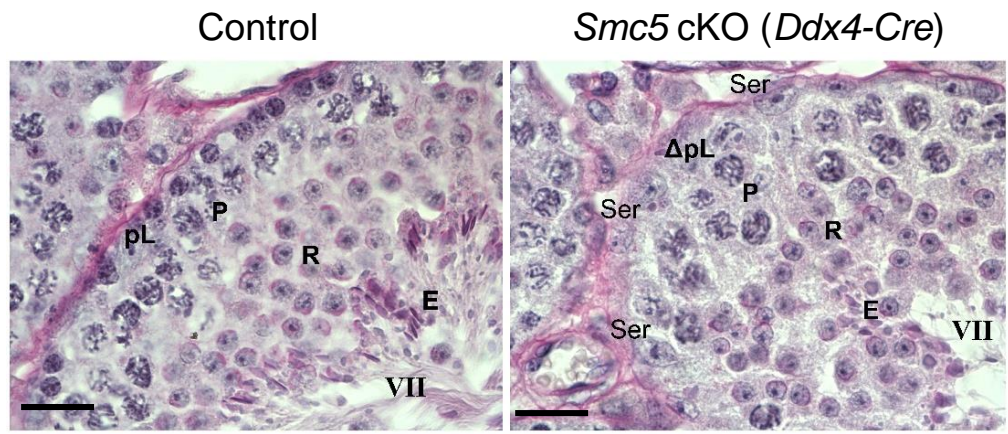

A

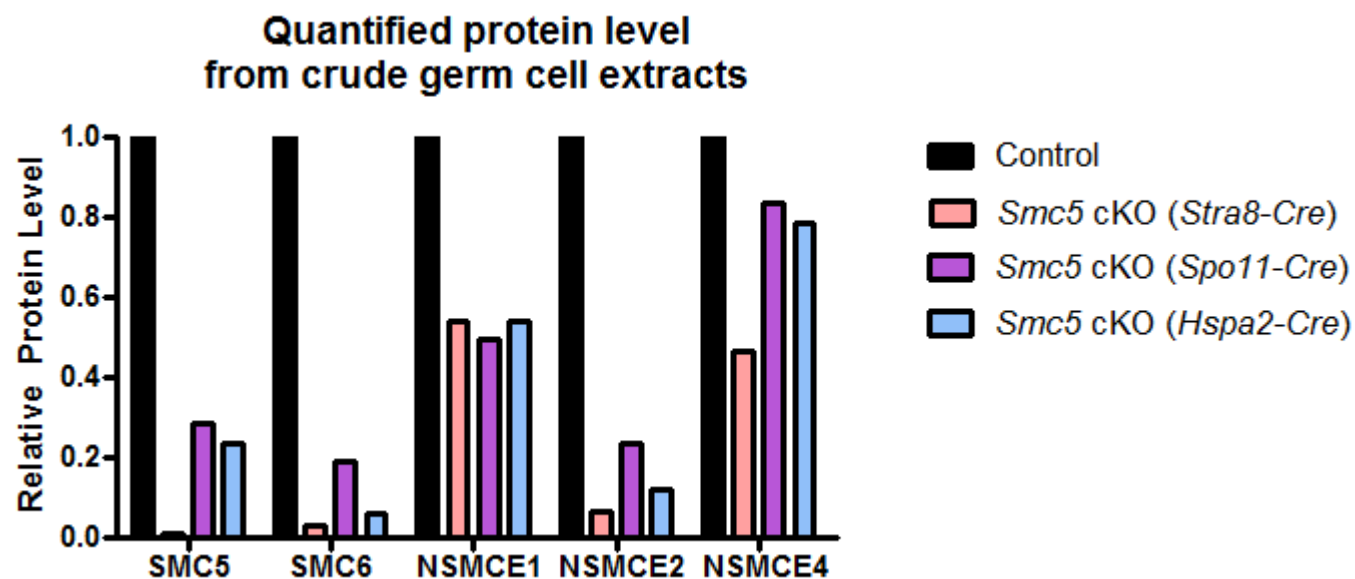

B

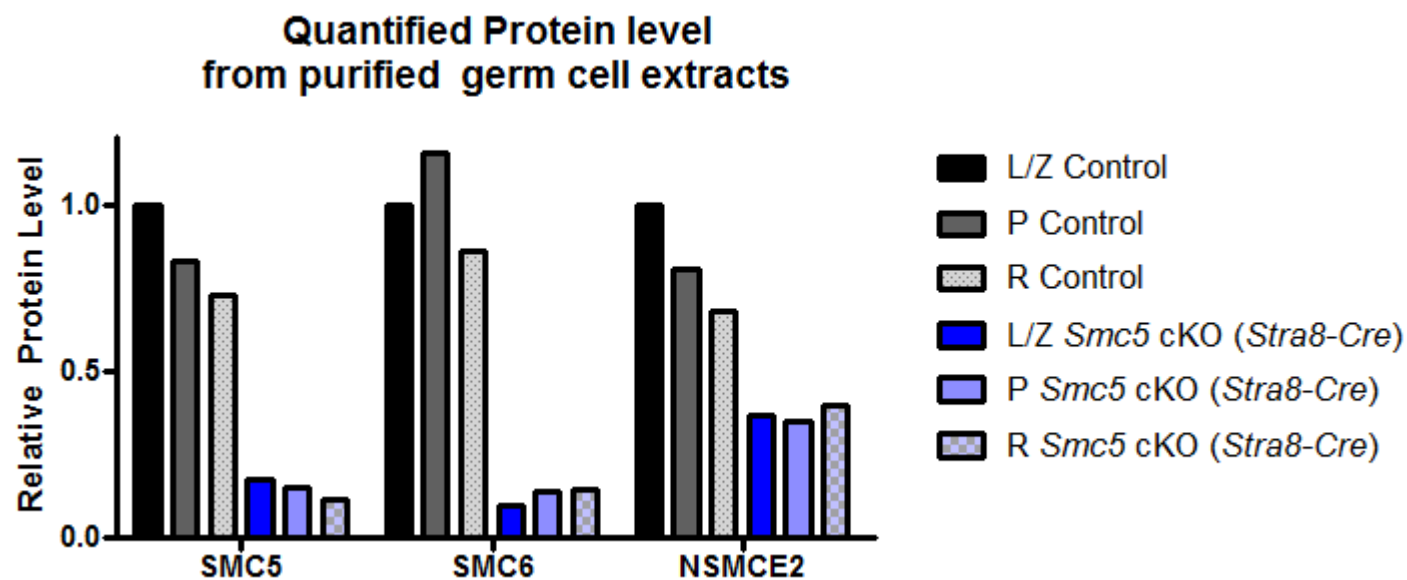

**A** Control *Smc5* cKO (*Spo11-Cre*)

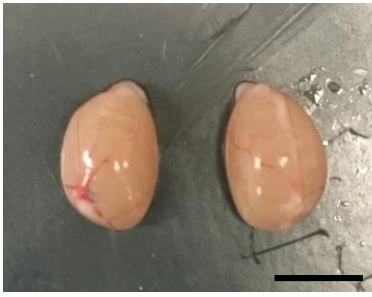

**B**

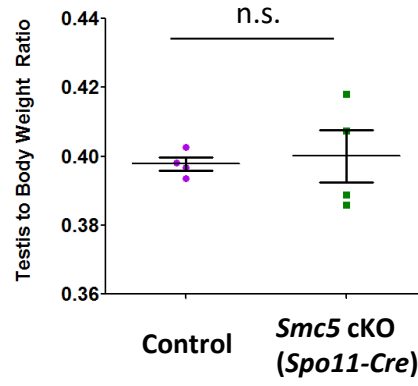

**C**

Control

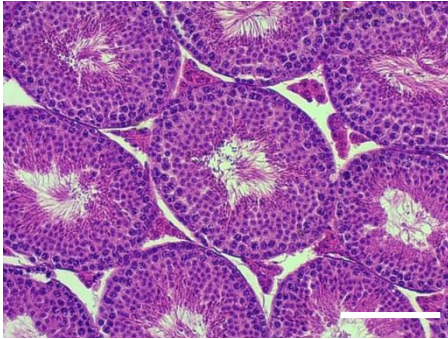

*Smc5* cKO (*Spo11-Cre*)

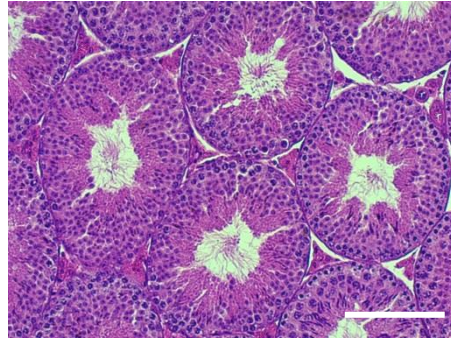

**D**

Control *Smc5* cKO (*Hspa2-Cre*)

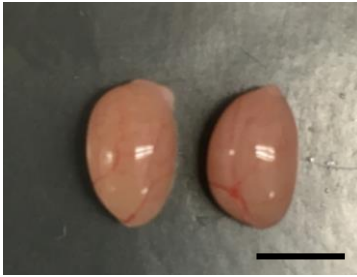

**E**

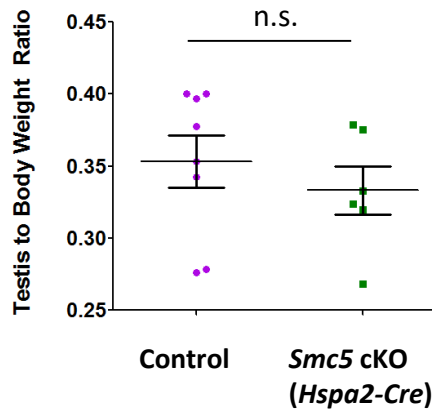

**F**

Control

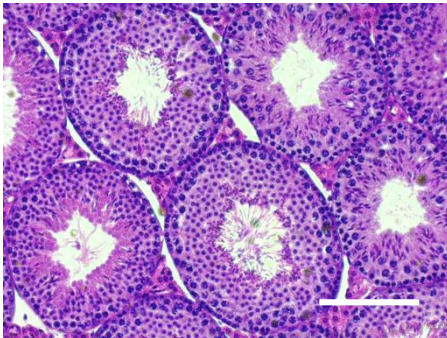

*Smc5* cKO (*Hspa2-Cre*)

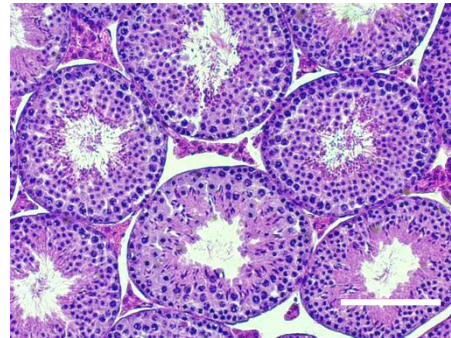

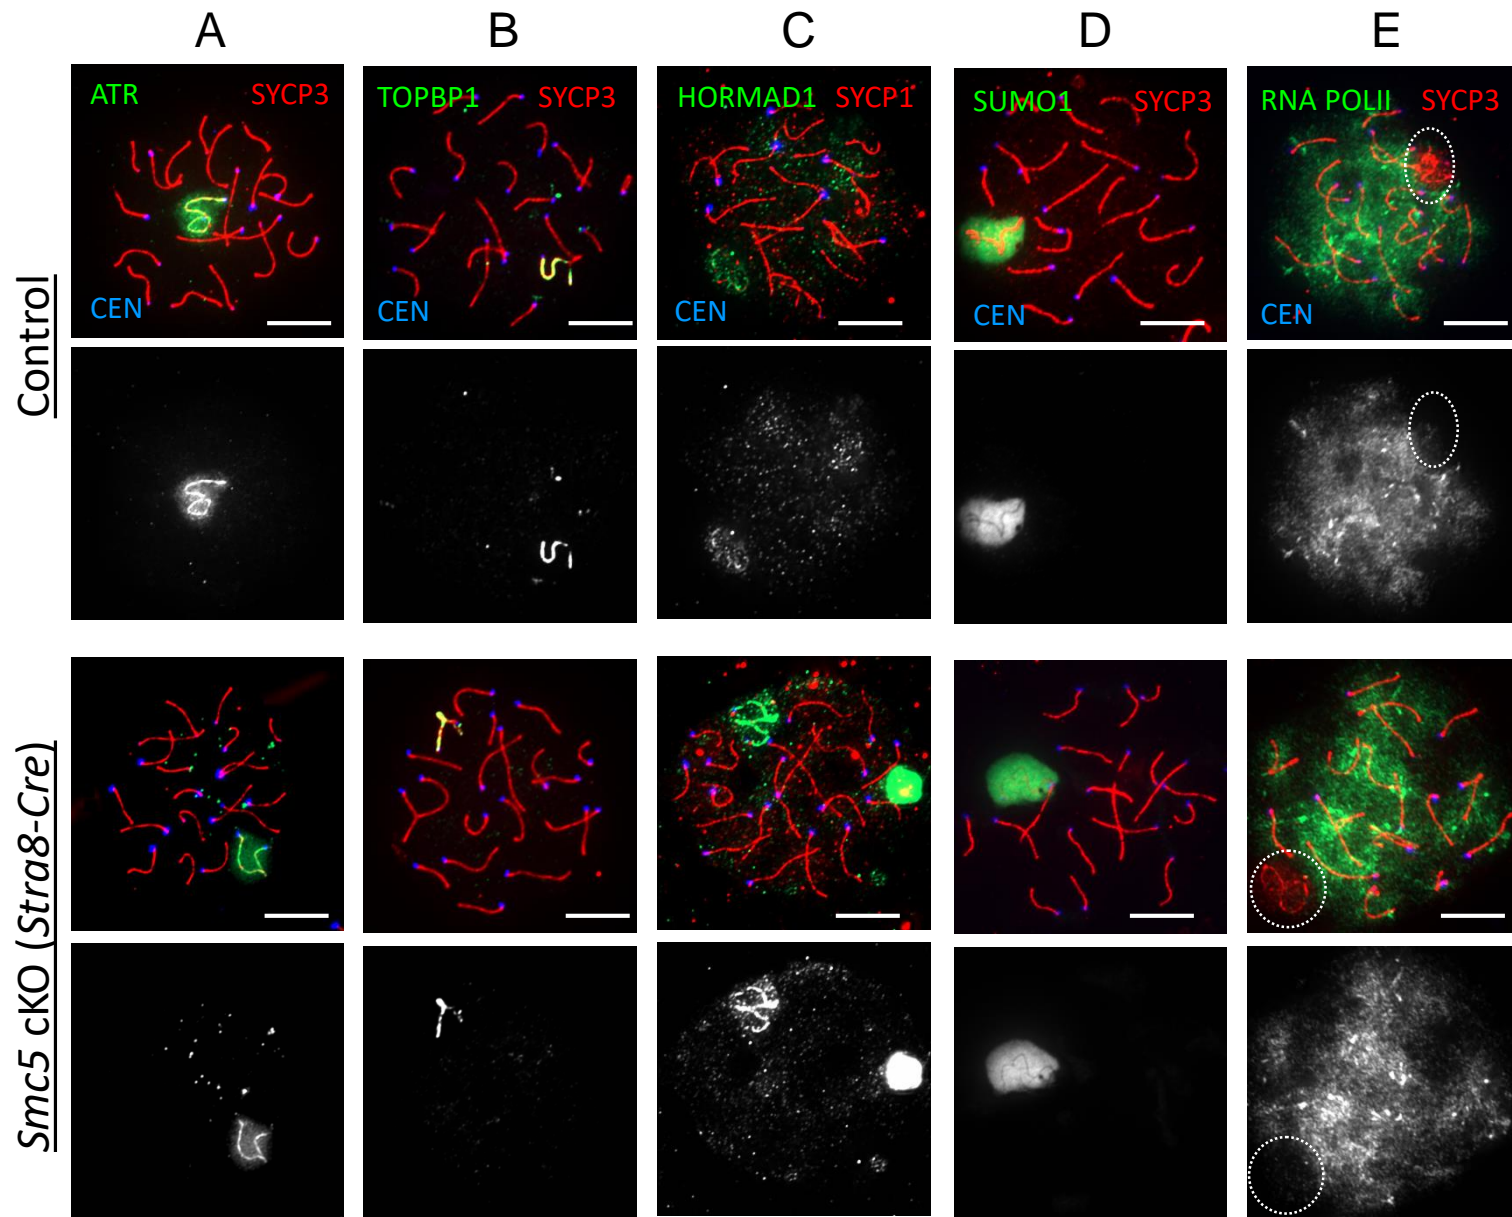



**A** Non-irradiated

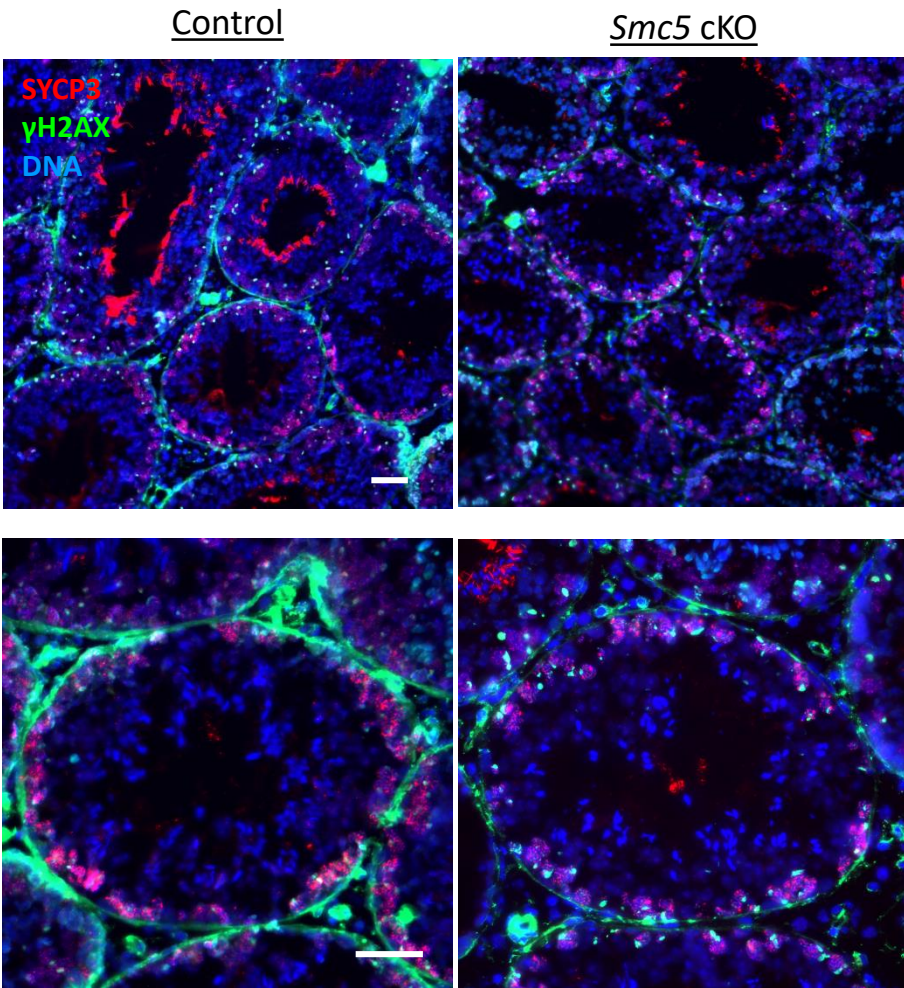

**B** Irradiated

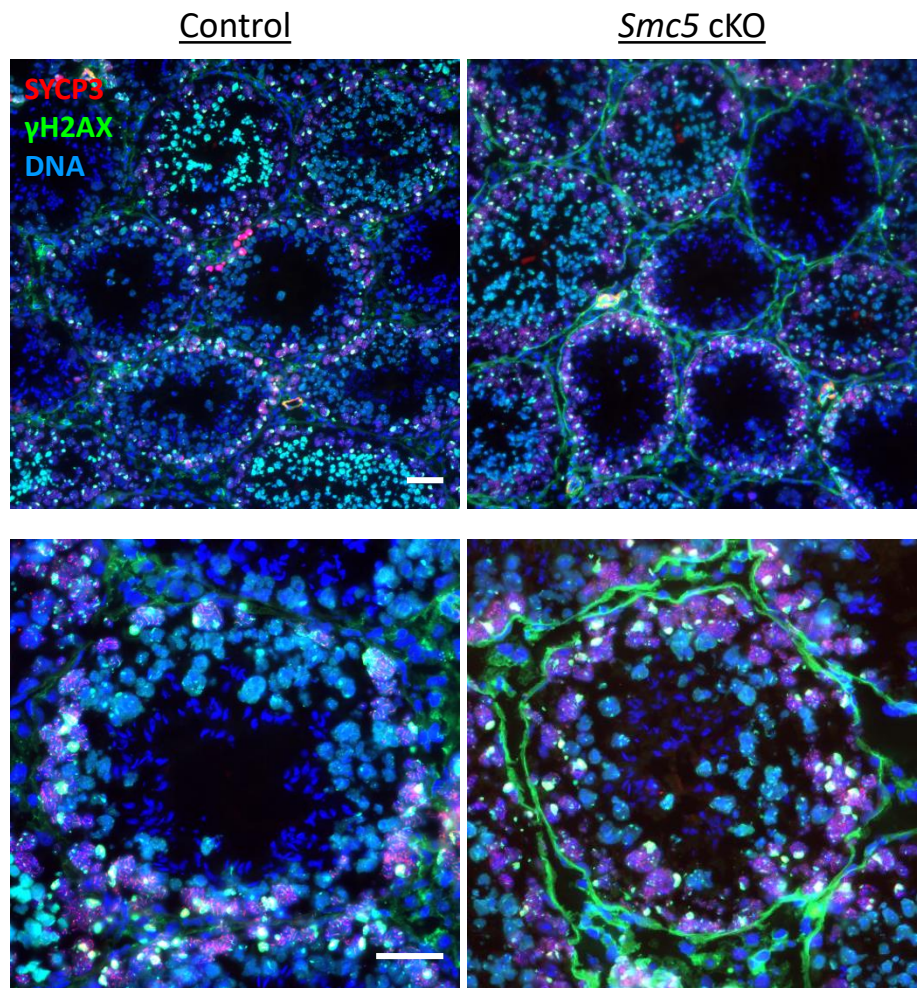

## Spermatid morphology 10 days post $\gamma$ -irradiation

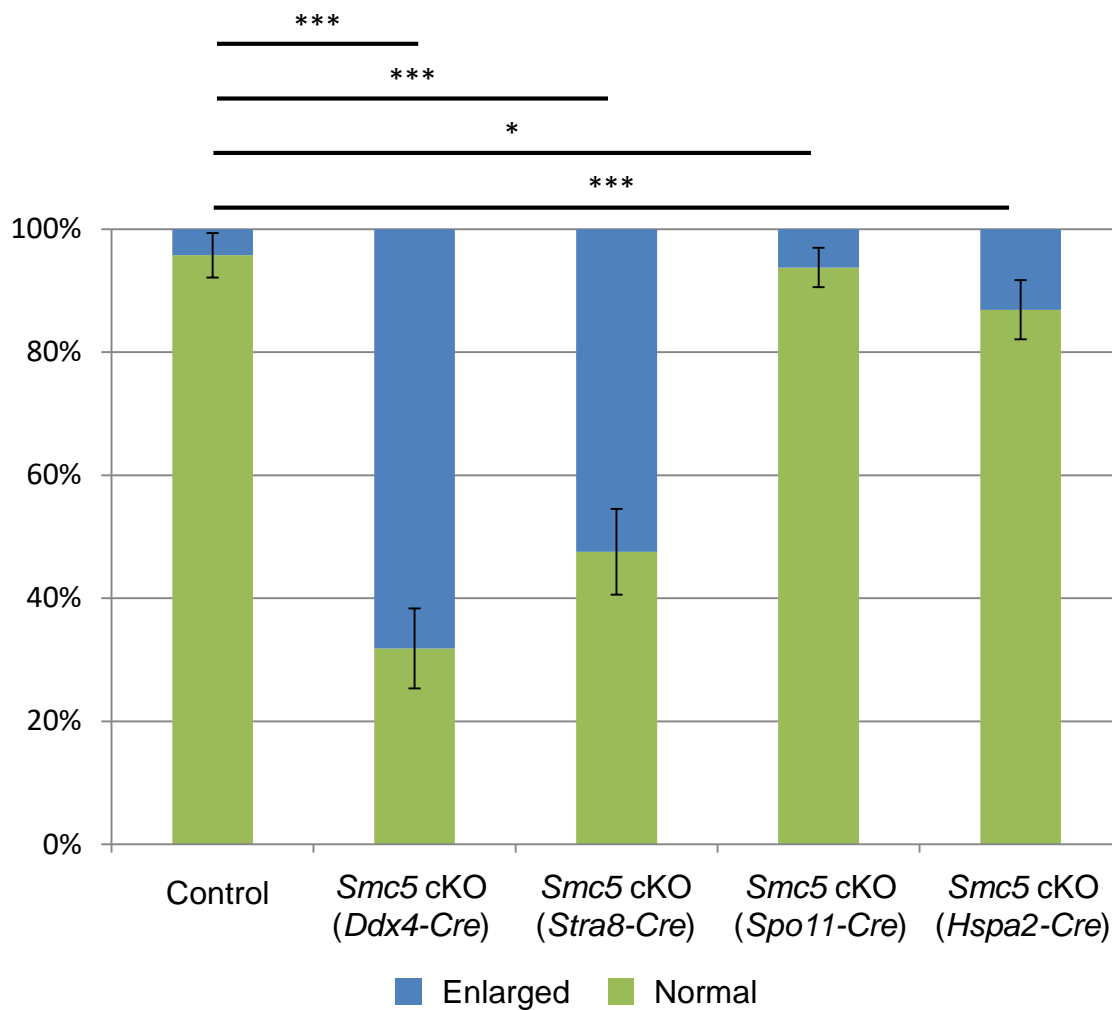

**Supplemental Table S1: Analysis of fertility and Cre excision efficiency**

| Strain                                            | Offspring genotype distribution |                  |          |
|---------------------------------------------------|---------------------------------|------------------|----------|
|                                                   | <i>Smc5+/flox</i>               | <i>Smc5+/del</i> | Total    |
| ♂ <i>Smc5flox/del</i><br>x ♀ wild-type            | 48%<br>(29 pups)                | 52%<br>(32 pups) | 61 pups  |
| ♂ <i>Smc5flox/del, Ddx4-Cre</i><br>x ♀ wild-type  | 3%<br>(1 pup)                   | 95%<br>(38 pups) | 39 pups  |
| ♂ <i>Smc5flox/del</i><br>x ♀ wild-type            | 51%<br>(97 pups)                | 49%<br>(94 pups) | 191 pups |
| ♂ <i>Smc5flox/del, Stra8-Cre</i><br>x ♀ wild-type | 6%<br>(6 pups)                  | 94%<br>(88 pups) | 94 pups  |
| ♂ <i>Smc5flox/del</i><br>x ♀ wild-type            | 50%<br>(26 pups)                | 50%<br>(26 pups) | 52 pups  |
| ♂ <i>Smc5flox/del, Spo11-Cre</i><br>x ♀ wild-type | 15%<br>(6 pups)                 | 85%<br>(34 pups) | 40 pups  |
| ♂ <i>Smc5flox/del</i><br>x ♀ wild-type            | 49%<br>(51 pups)                | 51%<br>(53 pups) | 104 pups |
| ♂ <i>Smc5flox/del, Hspa2-Cre</i><br>x ♀ wild-type | 2%<br>(1 pups)                  | 98%<br>(64 pups) | 65 pups  |

**Supplemental Table S2: Primary Antibodies used in this study**

| Primary Antibodies               |        |                         |               |              |             |
|----------------------------------|--------|-------------------------|---------------|--------------|-------------|
| Target Protein                   | Host   | Source                  | Cat. Number   | IHC Dilution | WB Dilution |
| ATR                              | Goat   | Santa Cruz              | sc-18887      | 1:50         |             |
| CREST (CEN)                      | Human  | Antibodies Incorporated | 15-235        | 1:50         |             |
| HORMAD1                          | Rabbit | Abcam                   | ab155176      | 1:100        |             |
| Lectin PNA-AF488 conjugate       | NA     | Molecular Probes        | L21409        | 1:700        |             |
| LIN28                            | Rabbit | Abcam                   | ab46020       | 1:5000       |             |
| MLH1                             | Mouse  | Thermo-Fisher           | MA51531       | 1:100        |             |
| NSE1                             | Mouse  | Abcam                   | ab168578      |              | 1:1000      |
| NSE2                             | Mouse  | Novus Biologicals       | H00286053-B01 |              | 1:500       |
| NSE4a                            | Rabbit | Sigma                   | HPA037459     |              | 1:100       |
| PCNA                             | Rabbit | Abcam                   | ab29          | 1:30,000     |             |
| RAD51                            | Rabbit | Thermo                  | PA527195      | 1:100        |             |
| RNA Polymerase II (RNA POLII)    | Mouse  | Millipore               | 05-623        | 1:400        |             |
| SMC5                             | Rabbit | Novus Biologicals       | NB100-469     |              | 1:400       |
| SMC6                             | Rabbit | Abcam                   | ab155495      |              | 1:500       |
| SYCP3                            | Mouse  | Santa Cruz              | sc-74569      | 1:50         |             |
| SYCP3                            | Goat   | Santa Cruz              | sc-20845      | 1:50         |             |
| SYCP3                            | Goat   | Novus Biologicals       | af3750        | 1:100        |             |
| TOPBP1                           | Rabbit | Abcam                   | ab2402        | 1:100        |             |
| $\alpha$ tubulin ( $\alpha$ TUB) | Mouse  | Sigma                   | T9026         | 1:1000       | 1:10,000    |
| $\gamma$ H2AX                    | Mouse  | Thermo                  | MA1-2022      | 1:500        |             |
| $\gamma$ tubulin (TUB)           | Mouse  | Sigma                   | T6557         | 1:1000       |             |
